# Supplementary material
Source: Springer Nature journal article supplement (https://www.springermedizin.de/resource/supplementary/13045_2011_171_MOESM10_ESM.pdf/9660806)

**PRS**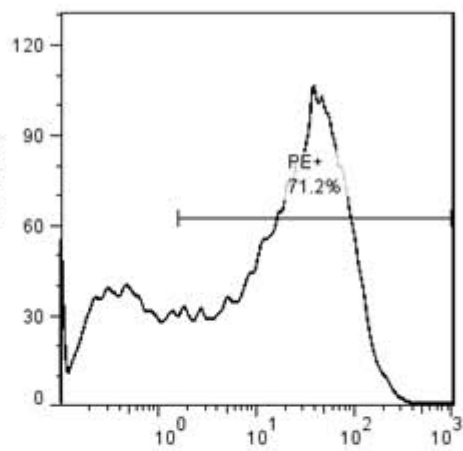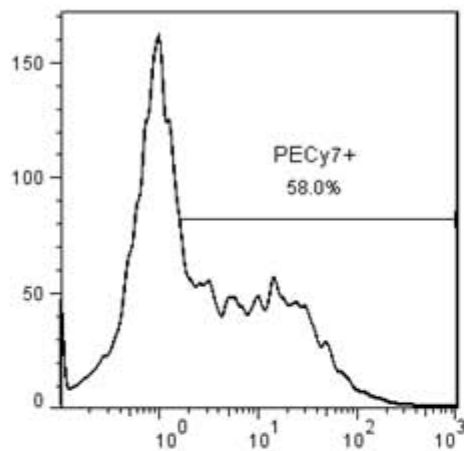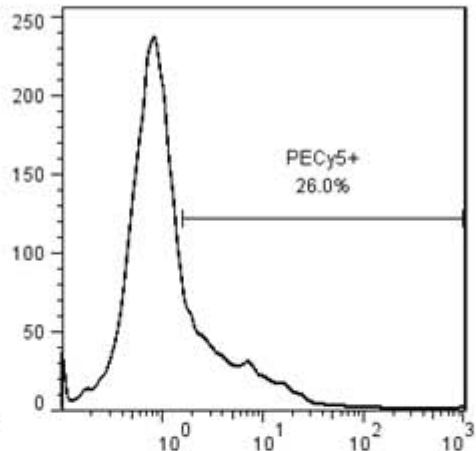**#7412**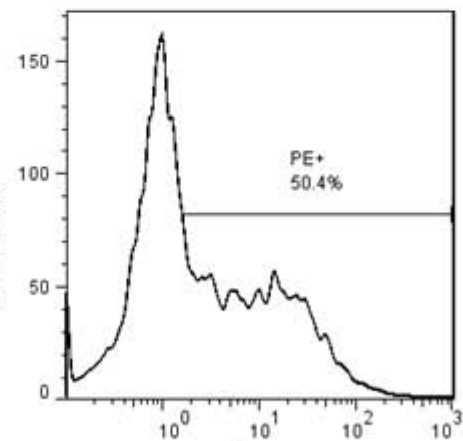**Sca-1**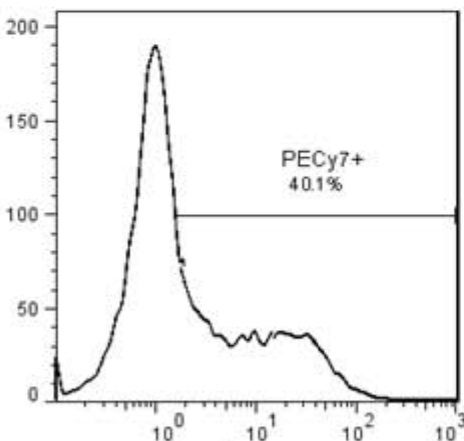**c-Kit**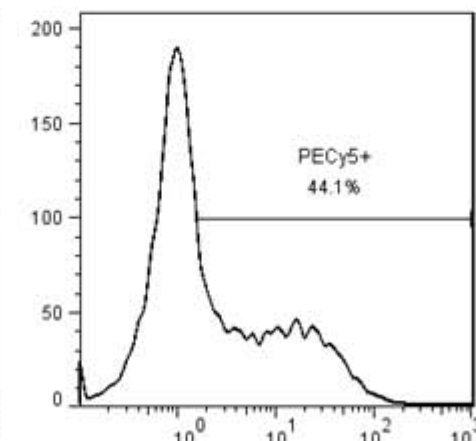**Lin+**

Supplement: MOESM10 [file 9660806]
